# Supplementary material
Source: Springer Nature journal article supplement (https://www.springermedizin.de/resource/supplementary/13058_2011_2968_MOESM13_ESM.pdf/9702986)

**A**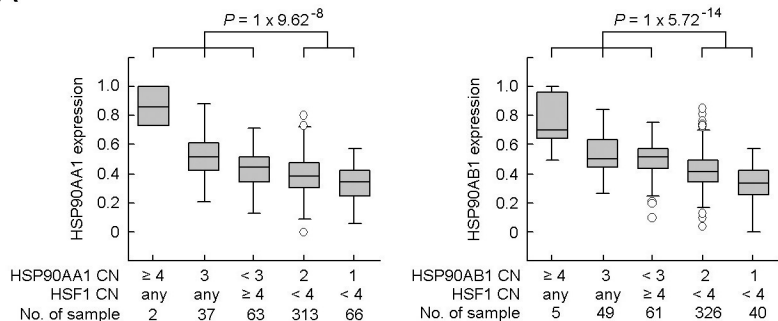**B**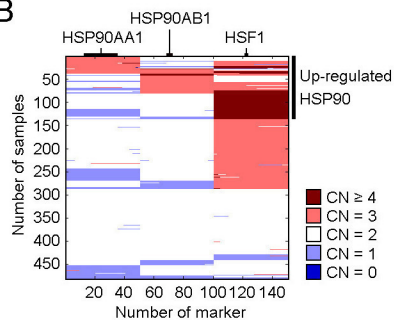**C**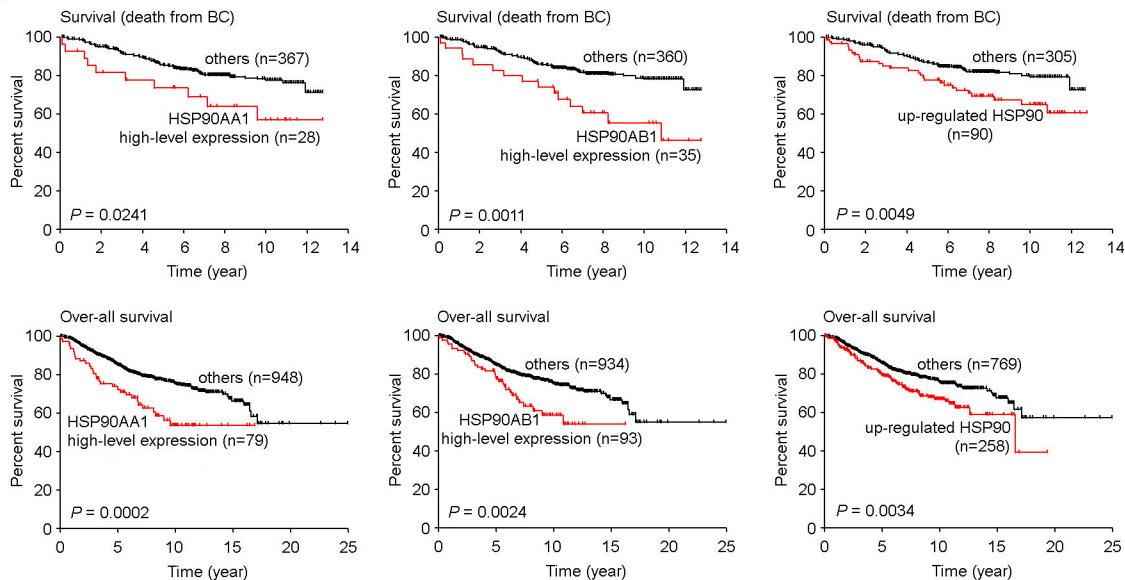

Supplement: MOESM13 [file 9702986]
